# Supplementary material for: Surgical resection of recurrent differentiated thyroid cancer: patterns, detection, staging, and treatment of 683 patients
Source: PubMed Central journal article supplement (PMC10731281; doi:10.3389/fendo.2023.1301620), 2023-12-06
Supplement: DataSheet_1.pdf [file DataSheet_1.pdf]

**Supplementary table1. Differences of clinical features of second-surgery DTC patients in different stages**

|                                             | <b>2008.6—2012.12</b> | <b>2013.01-2015.12</b> | <b>2016.01—2021.6</b> | <b><i>P</i></b> |
|---------------------------------------------|-----------------------|------------------------|-----------------------|-----------------|
| <b>Sex</b>                                  |                       |                        |                       | 0.716           |
| Male                                        | 49(23.2%)             | 48(25.4%)              | 75(26.5%)             |                 |
| Female                                      | 162(76.8%)            | 141(74.6%)             | 208(73.5%)            |                 |
| <b>Age of initial diagnosis</b>             | 38(29;46)             | 38(31;45)              | 37(30;45)             | 0.721           |
| <55                                         | 195(92.4%)            | 177(93.7%)             | 262(92.6%)            | 0.902           |
| ≥55                                         | 16(7.6%)              | 12(6.3%)               | 21(7.4%)              |                 |
| <b>Age of secondary surgery</b>             | 40(30;47)             | 41(33;47)              | 41(33;49)             | 0.117           |
| <55                                         | 189(89.6%)            | 172(91.0%)             | 247(87.3%)            | 0.454           |
| ≥55                                         | 22(10.4%)             | 17(9.0%)               | 36(12.7%)             |                 |
| <b>Second thyroid surgery</b>               |                       |                        |                       | <0.001          |
| Total thyroidectomy                         | 80(43.0%)             | 106(87.6%)             | 131(85.1%)            |                 |
| Near-total thyroidectomy                    | 104(55.9%)            | 11(9.1%)               | 9(5.8%)               |                 |
| lobectomy + isthmusectomy                   | 2(1.1%)               | 4(3.3%)                | 14(9.1%)              |                 |
| Total thyroidectomy(initial)                | -                     | -                      | -                     |                 |
| <b>Second lymph node dissection</b>         |                       |                        |                       | <0.001          |
| No lymph node dissection                    | 6(2.8%)               | 1(0.5%)                | 3(1.1%)               |                 |
| CLND                                        | 6(2.8%)               | 22(11.6)               | 71(25.1%)             |                 |
| Unilateral LLND                             | 39(18.5%)             | 22(11.6%)              | 72(25.4%)             |                 |
| CLND + Unilateral LLND                      | 5(45.0%)              | 69(36.5%)              | 89(31.4%)             |                 |
| Bilateral LLND                              | 21(10.0%)             | 25(13.8%)              | 29(10.2%)             |                 |
| CLND + Bilateral LLND                       | 44(20.9%)             | 49(25.9%)              | 19(6.7%)              |                 |
| <b>The length of secondary surgery(min)</b> | 225(185;290)          | 180(140;230)           | 150(100;190)          | <0.001          |
